# Supplementary material for: Rapid and sensitive detection of the activity of ADAM17 using a graphene oxide-based fluorescence sensor
Source: Royal Society of Chemistry journal article supplement (doi:10.1039/c8an02344a), 2019-01-01
Supplement: c8an02344a1.pdf [file c8an02344a1.pdf]

## Supplementary Material

### Rapid and Sensitive Detection of the Activity of ADAM17 using Graphene Oxide-based Fluorescent Sensor

Youwen Zhang, Xiaohan Chen, Golbarg M Roozbahani, Xiyun Guan\*

Department of Chemistry, Illinois Institute of Technology, 3101 S Dearborn St, Chicago, IL 60616, USA

#### Table of Contents:

|                                                                                                                                                           |     |
|-----------------------------------------------------------------------------------------------------------------------------------------------------------|-----|
| <b>Figure S1.</b> Effect of cGO concentration on fluorescence intensity and quenching efficiency of peptide Pep-FAM .....                                 | S-2 |
| <b>Figure S2.</b> An enlarged view of the FTIR spectra of GO, cGO and cGO-Pep-FAM in the region from 1500 cm <sup>-1</sup> to 2000 cm <sup>-1</sup> ..... | S-3 |
| <b>Figure S3.</b> Raman spectra of cGO and cGO-Pep-FAM .....                                                                                              | S-4 |
| <b>Figure S4.</b> Effect of reaction time on cGO-Pep-FAM detection of ADAM17 .....                                                                        | S-5 |
| <b>Figure S5.</b> Effect of HSA on the background fluorescence intensity of the cGO-Pep-FAM sensor .....                                                  | S-6 |

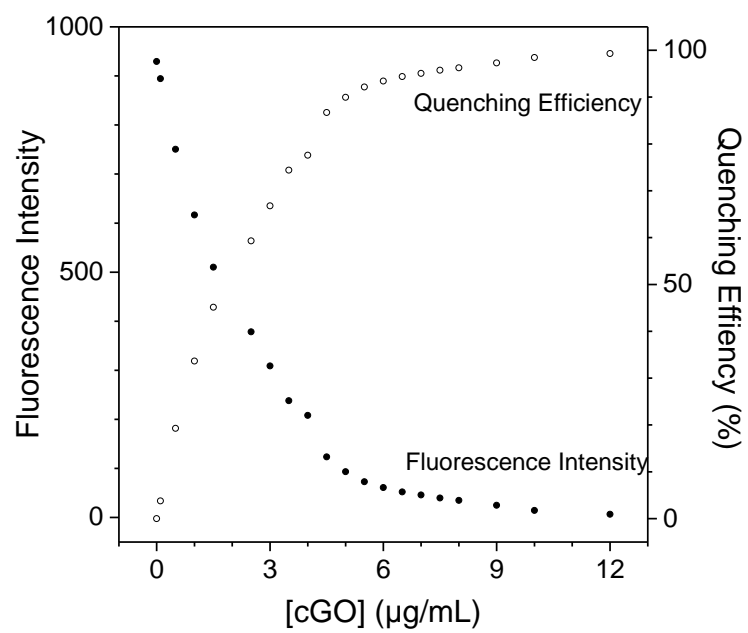

**Figure S1.** Effect of cGO concentration on fluorescence intensity and quenching efficiency of peptide Pep-FAM.

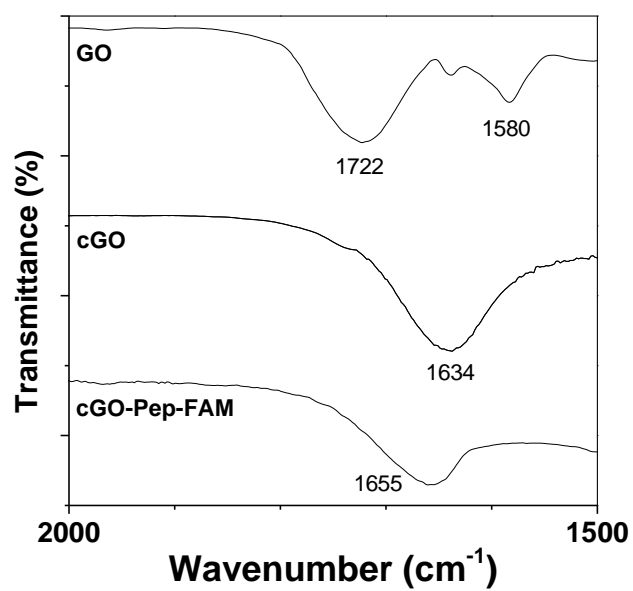

**Figure S2.** An enlarged view of the FTIR spectra of GO, cGO and cGO-Pep-FAM in the region from 1500 cm<sup>-1</sup> to 2000 cm<sup>-1</sup>.

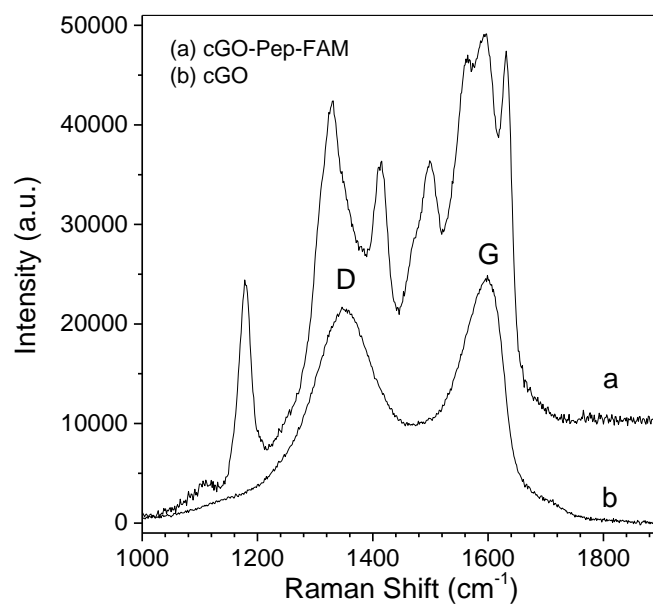

**Figure S3.** Raman spectra of cGO and cGO-Pep-FAM. The D- and G-bands ( $1344\text{ cm}^{-1}$  and  $1587\text{ cm}^{-1}$ , respectively) represent the characteristic Raman shift of graphene skeleton.

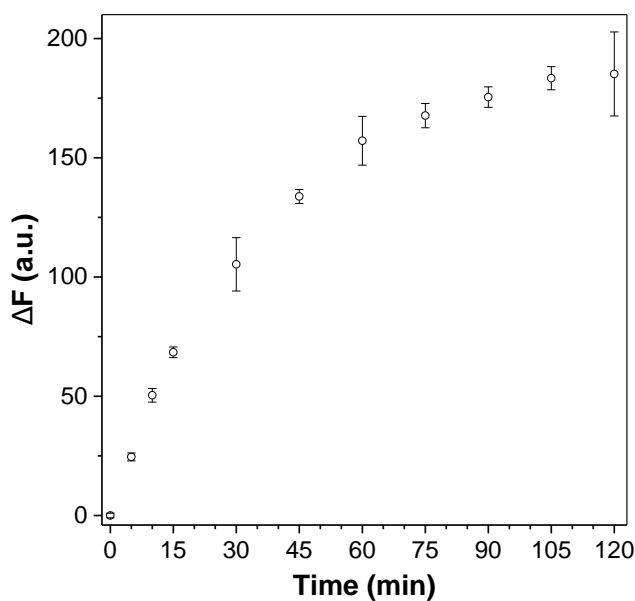

**Figure S4.** Effect of reaction time on cGO-Pep-FAM detection of ADAM17. Experiments were performed by incubating cGO-Pep-FAM suspension solutions (0.5  $\mu\text{g/mL}$ , in Tris buffer, pH 7.5) with ADAM17 (100 ng/mL) at 37 °C for a period of time ranging from 0 to 120 minutes, followed by measuring their fluorescence intensity with  $\lambda_{\text{ex/em}} = 492/515$  nm at room temperature. The fluorescence intensity values were background corrected, which were obtained by subtracting the blank fluorescence intensity from that of the analyte ADAM17. Each data point represents the average from three replicate analyses  $\pm$  one standard deviation.

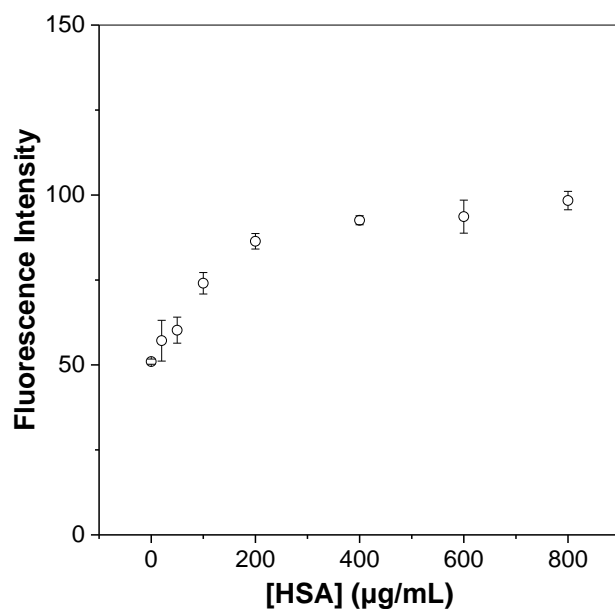

**Figure S5.** Effect of HSA on the background fluorescence intensity of the cGO-Pep-FAM sensor. Experiments were performed by incubating cGO-Pep-FAM suspension solutions (0.5  $\mu\text{g/mL}$ , in Tris buffer, pH 7.5) with various concentrations of HSA for 60 min, followed by measuring their fluorescence intensity with  $\lambda_{\text{ex/em}} = 492/515$  nm at room temperature. Each data point represents the average from three replicate analyses  $\pm$  one standard deviation.
